# Supplementary material for: The Plasmodium liver-specific protein 2 (LISP2) is an early marker of liver stage development
Source: eLife. 2019 May 16;8:e43362. doi: 10.7554/eLife.43362 (PMC6542585; doi:10.7554/eLife.43362)
Supplement: Figure 3—figure supplement 1—source data 1. [file elife-43362-fig3-figsupp1-data1.xlsx]

## Sheet: Figure 3-Figure supplement 1A
	The relative proportion of all three LISP2 parasites populations in monolayer inection from day 1-day 12*
	LISP2-					LISP2+					LISP2++
	Biological Replicate 1	Biological Replicate 2	Biological Replicate 3			Biological Replicate 1	Biological Replicate 2	Biological Replicate 3			Biological Replicate 1	Biological Replicate 2	Biological Replicate 3
D1	100	100	100			0	0	0			0	0	0
D2	100	100	100			0	0	0			0	0	0
D3	85.8586	92.1296	95.5075			14.1414	7.87037	4.49251			0	0	0
D4	84.9057	81.8182	66.4145			11.3208	16.3102	32.6778			3.77359	1.87166	0.907716
D5	83.3333	65.2015	63.3274			10.4167	12.0879	2.50447			6.25	22.7106	34.1682
D6	73.0159	77.7311	68.3884			7.93651	1.68067	1.8595			19.0476	20.5882	29.7521
D7	75	78.534	68.1716			2.5	8.37696	1.58014			22.5	13.089	30.2483
D8	70	76.8786	66.6667			5	3.46821	2.72727			25	19.6532	30.6061
D9	79.1667	87.3786	76.087			12.5	0.970874	2.71739			8.33333	11.6505	21.1957
D10	81.579	85.3658	74.3719			7.89474	2.43902	1.00503			10.5263	12.1951	24.6231
D11	79.1667	87.8378	82.7957			8.33333	0	6.45161			12.5	12.1622	10.7527
D12	70.8333	81.4159	79.7297			12.5	3.53982	6.75676			16.6667	15.0442	13.5135
	*For each independent experiment, total number of parasites at each time point was deduced from three technical replicate wells (n=3).

## Sheet: Figure 3-Figure supplement 1B
	The relative proportion of all three LISP2 parasites populations in monolayer inection from day 13-day 21*
	LISP2-					LISP2+					LISP2++						Merosomes
	Biological Replicate 1	Biological Replicate 2	Biological Replicate 3			Biological Replicate 1	Biological Replicate 2	Biological Replicate 3			Biological Replicate 1	Biological Replicate 2	Biological Replicate 3			Biological Replicate 1	Biological Replicate 2	Biological Replicate 3
D13	58.6667	52.9969	75.8974			5.36278	6.66667	1.28205			18.6667	24.2902	14.1026			16	17.3502	8.71795
D15	49.2537	60.6695	82.0611			2.51046	5.97015	2.67176			20.8955	20.0837	8.01527			23.8806	16.7364	7.25191
D18	64.4444	57.7236	72.2892			7.31707	8.88889	6.0241			15.5556	17.0732	10.8434			11.1111	17.8862	10.8434
D21	45.283	50.4132	62.2951			7.43802	7.54717	4.91803			28.3019	26.4463	22.9508			18.8679	15.7025	9.83607
	*For each independent experiment, total number of parasites at each time point was deduced from three technical replicate wells (n=3).

## Sheet: Figure 3-Figure supplement 1C
	the total count of parasites at each time points from day 1- 21 post sporozoite infection*
	Total no of parasites
	Biological Replicate 1	Biological Replicate 2	Biological Replicate 3
D1	100	372	645
D2	71	343	680
D3	99	216	601
D4	53	374	661
D5	48	273	559
D6	63	238	484
D7	40	191	443
D8	60	173	330
D9	24	103	184
D10	38	123	199
D11	24	74	93
D12	24	113	74
D13	37	158	195
D15	33	119	131
D18	22	61	41
D21	26	60	30
	*For each independent experiment, total number of parasites at each time point was deduced from three technical replicate wells (n=3).
