# Supplementary material for: The Plasmodium liver-specific protein 2 (LISP2) is an early marker of liver stage development
Source: eLife. 2019 May 16;8:e43362. doi: 10.7554/eLife.43362 (PMC6542585; doi:10.7554/eLife.43362)
Supplement: Figure 3—source data 1. [file elife-43362-fig3-data1.xlsx]

## Sheet: Sheet1
LISP2- Hypnozoites
					Data from three biological replicates are pooled together for each day is shown
Days post infection	Size of liver stage parasites (diameter)
1	1.24	1.39	1.66	1.12	1.16	1.21	1.09	1.29	1.36	1.26	1.14	1.41	1.27	1.2	1.19	1.39	1.24	1.18	1.22	1.43	1.31	1.42	1.07	1.28	1.42	1.03	0.98	1.04	1.12	1.18	1.34	1.12	1.06	1.11	1.42	1.34	1.56	1.26	1.43	1.04	1.28	1.56	1.22	1.43
2	1.34	1.41	1.84	2.11	1.26	2.15	1.88	1.29	1.43	1.94	1.67	2.16	1.37	1.22	1.91	1.44	1.32	1.61	1.27	2.03	2.49	2.61	1.96	2.84	2.04	2.16	1.94	1.67	2.86	1.76	1.82	1.79	2.64	2.49	2.66	2.81	1.84	2.03	2.19	2.63	2.24
3	4.11	4.28	3.61	3.49	4.03	3.69	3.52	3.14	3.28	2.98	3.08	3.84	3.24	3.64	3.18	3.02	4.01	4.13	3.54	3.65	3.5	3.4	3.79	3.61	3.63	4.12	3.51	4.08	3.21	3.41	3.2	3.34	3.39	2.16	3.78	3.19	3.32	4.19	4.4	3.05	2.42	2.45	3.84	3.15	4.01	3.31	2.68	3.15	3.3
4	5.02	4.76	4.84	4.54	4.96	4.86	3.92	4.12	4.54	4.81	5.06	5.12	4.78	5.11	4.83	4.73	5.16	3.24	3.81	4.4	4.37	3.11	4.23	3.86	2.65	2.31	3.34	3.51	3.75	4.57	3.83	3.89	3.44	2.21	3.79	2.94	4.3	2.6	2.81	3.14	3.47	2.08	3.29	3.19	2.77	2.75	2.78
5	5.04	5.63	4.32	3.96	3.17	4.18	4.41	5.49	5.58	3.87	4.73	5.73	4.76	4.71	5.31	4.22	3.84	4.42	4.28	5.31	3.74	4.8	3.72	4	3.03	3.01	3.56	3.49	3.55	3.23	3.03	3.65	3.29	3.18	3.1	3.8	3.9	3.2	4.01	3.53
6	4.82	5.01	5.86	5.72	5.91	5.42	4.88	4.96	4.91	5.09	5.76	4.74	4.99	4.79	4.59	5.89	5.77	5.01	5.94	5.76	3.86	3.62	4.33	5.1	3.81	4.4	4.79	4.85	5.48	4.3	4.98	4.01	4.7	4.72	4.21	5.08	4.6	4.31	3.5	4.54	5.01	4.62	5.18	4.85	4.06	5.28	4.9	3.49	4.35
7	6.41	6.26	5.89	5.46	5.84	5.63	4.67	4.99	5.09	6.28	5.63	6.12	6.04	5.29	5.54	6.21	4.49	6.19	6.29	3.29	3.48	4.61	3.6	4.17	2.73	4.86	4	4.02	4.15	4.43	4.42	5.53	4.34	4.3	5.09	5.36	5.21	5.54	5.18	5.3	5.32	5.01	4.66	5.71	4.15	4.86	4.12	6.18	5.03
8	5.1	6.8	5.22	7.04	6.29	6.89	7.14	6.32	5.39	6.1	6.1	6.3	5.6	5.6	6.5	7.09	6.7	6.6	5.91	6.96	5.31	5.54	6.12	6.11	4.1	4.43	4.18	5.05	5.35	5.04	3.63	3.67	3.97	4.09	4.45	6.36	5.58	3.49	5.35	4.88	3.86	4.11	4.26	3.77	3.88	2.98	4.4	4.09	4.59
9	6.14	5.39	5.97	5.47	6.84	6.67	6.59	6.84	5.69	6.96	6.04	6.34	6.28	5.91	6.32	7.03	6.84	7.11	6.43	6.7	5.84	3.39	6.55	6.67	6.42	6.22	5.97	6.11	5.89	6.56	6.16	6.34	6.13	5.2	5.67	5.82	6.14	5.88	6.41	6.48	5.84	6.82	5.04	5.41	5.51	6.01	6.65
10	6.86	6.42	6.51	6.84	7.4	5.63	5.87	6.67	5.44	6.91	6.72	6.32	6.28	6.32	5.64	5.69	6.59	6.87	5.8	6.4	4.03	5.2	5.52	5.45	5.72	5.86	5.6	5.81	5.33	4.88	5.88	6.03	5.22	5.32	3.98	6.07	4.6	5.02	5.88	5.37	5.82	5.92	6.01	6.21	6.41	5.97	6.01	5.81	6.21
11	6.84	5.62	5.88	7.07	7.12	6.57	6.92	7.62	7.01	6.55	6.33	5.91	5.96	6.19	6.54	7.07	7.14	6.71	6.84	6.55	6.73	6.2	6.04	6.15	6.16	7.09	6.12	5.72	5.07	5.51	5.67	5.79	4.41	4.84	5.05	5.17	5.09	7.43	4.78	4.29	5.26	5.91	6.11	4.82	7.12	5.18	5.91	6.85	6.09
12	6.64	5.87	7.06	7.44	7.69	6.31	7.04	6.16	5.81	6.17	7.01	7.12	6.09	5.89	6.51	6.65	6.07	6.36	6.17	5.76	7.14	6.48	5.64	6.2	6.14	6.17	5.9	6.04	6.18	6.14	6.22	6.47	7.06	3.6	4.94	5.72	3.81	4.38	6.26	5.54	6.06	4.87	5.24	5.72	7.01	5.24	6.29	6.72
13	5.49	6.41	7.08	6.4	6.8	6.8	6.59	6.03	7.18	5.59	5.96	6.82	5.69	6.96	5.62	6.54	6.89	5.82	6.14	6.76	7.11	5.83	5.26	6.01	6.17	5.96	5.99	7.04	7.12	6.12	6.14	6.96	6.13	5.56	5.29	6.8	6.54	6.34	6.52	6.42	6.26
15	5.89	7.21	6.59	6.83	6.23	5.79	7.02	5.59	6.84	6.33	5.97	6.81	7.41	6.54	7.03	7.18	7.03	6.49	7.06	5.42	6.46	5.58	4.8	6.17	6.21	5.6	5.8	5.45	6.1	7.77	5.54	5.06	6.08	6.72
18	6.24	7.28	6.84	6.96	7.49	7.14	6.81	6.01	7.84	7.09	6.19	7.03	6.51	6.29	6.47	7.22	6.21	7.34	6.89	6.76	7.36	4.48	6.19	7.1	6.42	7.41	7.81	4.82	6.35	5.65	5.58	5.31	5.46	4.94	6.97	6.1
21	6.16	5.97	6.97	7.66	7.07	6.84	7.84	7.44	6.87	7.11	6.96	7.09	6.91	7.42	7.16	6.92	7.4	6.49	7.28	7.49	6.49	6.59	5.74	7.21	4.98	5.17	5.13	5.33	6.58	7.37	7.18	4.48	6.98	5.42	6.15	7.87	7.1	6.5	6.81	6.8	5.8	7.21
LISP2+ Trophozoites
Days post infection	Size of liver stage parasites (diameter)
1	No LISP2+ parasite observed
2	No LISP2+ parasite observed
3	7.19	6.91	7.19	7.03	7.42	7.28	8.01	7.24	6.92	6.94	7.33	6.91	6.99	7.16	6.58	7.61	7.41	7.34	7.1	6.8	5.96	5.78	6.74	5.7	5.6	5.03	5.44	7.08	6.01	5.92	5.15	7.19	6.91	7.19	7.03	7.42	7.28	8.01	7.24	6.92	6.94	7.33	6.91	6.99	7.16	6.58	7.61	7.41	7.34
4	7.72	7.01	6.78	7.11	7.21	7.01	6.83	6.91	6.84	7.19	7.84	6.22	6.76	6.91	7.21	7.41	6.78	6.54	5.19	6.13	5.93	5.69	6.24	5.98	6.42	6.07	4.03	4.85	5.55	7.28	5.71	4.33	5.89	4.85	5.2
5	7.48	7.63	6.82	7.01	7.49	6.97	8.04	6.91	7.17	7.78	7.09	7.39	6.76	7.59	8.9	7.81	5.66	7.8	7.2	5.8	5.7	5.7	7.6
6	6.84	6.96	7.07	7.18	7.01	6.68	6.91	7.14	7.28	7.28	7.24	6.99	7.11	5.58	5.87	5.92	5.59	5.83	5.41	5.43	5.87
7	7.14	7.08	6.96	6.84	7.18	7.82	6.81	6.96	6.84	6.49	4.84	5.72	5.87	6.71	6.77	5.07	5.3	6.76	6.32	5.56	6.12
8	7.18	6.86	6.83	7.14	6.69	6.89	6.97	6.63	6.84	6.72	6.96	7.07	7.14	8.04	7.19	7.04	6.87	7.48	7.11	6.23	7.63	6.58	7.1	6.66	6.19
9	6.89	7.44	6.97	7.03	7.14	7.32	6.24	6.76	6.39	7.49	7.34	6.92	7.19	8.04	7.29	6.71
10	7.49	6.84	7.49	7.67	7.98	7.42	7.64	6.59	7.71	6.87	6.89	6.86	6.16	7.92	6.4	6.3	5.98
11	7.59	7.61	7.09	6.97	7.51	6.63	7.13	8.07	6.8	7.6	7.2	7.4	5.59	6.3	5.8
12	7.03	6.96	6.49	6.79	6.86	7.16	8.04	7.89	8.16	7.89	7.56	7.67	7.89	8.18	4.47	6.41	7.33	8.29	6.68	9.42
13	7.72	7.89	6.89	7.09	6.78	6.84	7.04	7.12	7.1	7.7	6.89	7.01	7.1	7.2	7.03	6.87	6.82	7.13	7.15	6.99	6.98
15	7.16	6.84	7.89	6.49	7.4	6.59	6.86	8.96	7.18	7.58	7.01	6.88	7.79	7.22	7.1	6.1	5.9	6.3	6.4	5.9	6.5
18	7.67	8.07	6.84	8.11	6.44	7.16	7.04	7.12	8.14	5.89	6.96	6.4	7.6	7.27	5.96	6.25	5.9	6.5	6.8
21	7.11	6.91	7.18	6.84	7.91	8.09	6.76	7.86	7.67	8.09	8.4	6.81	5.87	6.83	5.9	6.64	6.12	6.31	6.29	6.3
LISP2++ Schizonts
Days post infection	Size of liver stage parasites (diameter)
1	No LISP2++ parasite observed
2	No LISP2++ parasite observed
3	No LISP2++ parasite observed
4	8.49	9.41	10.11	12.28	14.36	10.28	11.54	9.31	9.27	15.16	11.06	9.56	14.12	10.89	13.18	11.23	14.31	9.26	7.86	8.03	8.32	7.69	6.93	6.93	7.96	8.48
5	8.21	14.42	12.18	10.49	12.26	14.42	16.32	11.31	13.28	9.48	17.21	10	9.42	17.25	10.31	19.24	14.21	16.12	12.32	14.5	14.7	13.9	14.1	10.8	11.8	9.8	12.1	16	13.8
6	18.14	10.26	16.32	14.3	21.1	19.2	11.4	19.2	24.1	19.4	10.1	9.78	8.8	24	16.1	13.2	10.2	9.1	8.73	16.2	11.1	11.3	15.5	18.5	10.8	13.5	8.9	8.92	15.2	11.9	11.7	12.5	13.5	11.9	24.8	10.7	8.88	17	29.3	14.7
7	24.3	28.1	31.2	21.1	16.3	10.2	17.1	24.5	19.2	14.9	10.5	29.1	19.5	30.1	21.1	28.3	22.1	21.1	11.1	11.8	15.5	16.1	25.7	13.8	18.9	15	25.1	19.6	31.6	26.1	23.5	10.4	14.4	14.1	14.9	20.3
8	11.34	28.1	32.1	18.44	16.2	14.5	34.2	36.12	9.23	8.59	14.16	29.83	26.14	20.96	28.63	39.54	27.16	18.2	14.4	8.31	13	18.7	13.9	11.9	8.48	12.1	28.7	14.5	19.2	12.6	21.7	11.4	36.5	17.1	31.5	9.01	33.2	13.3	17.8	30.1	31	22.9	22.4	21
9	24.11	36.1	10.2	49.06	23.1	27.1	21.1	26.07	29.5	22.04	17.2	11.1	19.2	14.7	13.09	18.2	27.5	11.2	20.3	12.9	19.2	15.7	26.4	22.4	19.7	16.9	6.5	45.3	24.6
10	17.1	29.1	10.4	22.1	31.2	34.5	26.51	21.1	34.5	38.4	32.6	11.5	24.3	9.96	18.52	26.1	26	22.1	16.4	18.6	9.1	10.2	46.2	35.1	21.6	21.3	13.7	14.7	10.8	11.8	48.8
11	19.4	16.5	38.4	21.3	29.5	37.4	24.8	21.3	26.6	11.5	32.24	10.2	14.2	10.2	31.3	21.5	17.5	13.2	17.44	31.9	11.04	14.1	24.4	20.9	26.5	21.7	27.2	8.87	69.5	10.7	22.8
12	31.17	11.28	26.3	17.1	37.6	16.2	19.1	18.2	31.1	29.2	23.04	27.4	9.18	28.5	10.6	19.3	24.5	14.1	53	58.3	38.7	10.1	14.9	48.6	22.4	31	13.2
13	24.1	29.8	42.63	11.03	26.6	9.4	32.2	39.5	12.2	18.3	19.33	34.62	17.26	36.1	24.2	9.1	18.4	13.3	17.4	13.8	23.2	26.1	13.7	12.9	32.11	17.2	18.1	19.1	11.9	12.7	12.9	34.6	27.11	22.23
15	11.17	19.48	27.38	42.17	41.04	31.18	16.24	19.21	11.56	19.26	9.13	31.26	26.25	12.29	37.16	15.19	18.48	24.49	10.07	19.29	17.1	39.2	31	23.9	22.5	19.2	16.3	40.5	11.7	27	9.8	23.3	20.5	62	17.2	27.6	18.1
18	49.61	52.16	28.21	31.16	21.26	24.17	34.03	29.94	11.54	27.31	16.14	9.42	10.54	41.11	16.28	18.24	39.15	20.1	17.9	17.6	15.9	33.9	34.5	9.15	14.5	14.9	12.4	27.1	28.1	12.2	31.4	19.2	29	38
21	14.31	22.16	11.41	9.53	34.01	28.69	41.22	11.47	17.41	43.2	27.12	41.06	44.2	21.19	18.26	36.12	24.12	9.2	25.1	42.7	40.1	17.8	24	21	39.8	20	16	39	32	29	34
[truncated: 38 more columns]

## Sheet: Sheet2
1
1.24
1.39
1.66
1.12
1.16
1.21
1.09
1.29
1.36
1.26
1.14
1.41
1.27
1.2
1.19
1.39
1.24
1.18
1.22
1.43
1.31
1.42
1.07
1.28
1.42
1.03
0.98
1.04
1.12
1.18
1.34
1.12
1.06
1.11
1.42
1.34
1.56
1.26
1.43
1.04
1.28
1.56
1.22
1.43
