# Supplementary material for: The Plasmodium liver-specific protein 2 (LISP2) is an early marker of liver stage development
Source: eLife. 2019 May 16;8:e43362. doi: 10.7554/eLife.43362 (PMC6542585; doi:10.7554/eLife.43362)
Supplement: Figure 4—figure supplement 1—source data 1. [file elife-43362-fig4-figsupp1-data1.xlsx]

## Sheet: Sheet1
Data from two biological replicates are pooled together for each drug treatment is shown
				cell viability (%)*
	TQ	71.9337	78.1929	76.5528	87.6613	100.446	114.322
	PQ	89.6726	83.5222	99.8484	93.1406	97.2763	116.857
	ATQ	75.2388	78.2266	93.3915	85.4852	98.6703	118.987
	KDU691	106.822	96.8884	98.5988	76.1894	96.3524	105.873
	Puromycin	46.0439	34.6423	43.7398	48.4395	52.9868	58.0096
	Methanol	10.1888	11.2196	11.4184	11.4719	13.5781	16.6542
	*Uninfected primary hepatocytes were treated from day 4 to day 8 with folllowing drugs at 10 µM.
