# Supplementary material for: The Plasmodium liver-specific protein 2 (LISP2) is an early marker of liver stage development
Source: eLife. 2019 May 16;8:e43362. doi: 10.7554/eLife.43362 (PMC6542585; doi:10.7554/eLife.43362)
Supplement: Figure 4—source data 1. [file elife-43362-fig4-data1.xlsx]

## Sheet: Fig4B and C
	D8 (LISP2-)			D15 (LISP2-)				Day 21(LISP2-)
	Total parasite count in biological replicate 1*	Total parasite count in biological replicate 2*			Total parasite count in biological replicate 1*	Total parasite count in biological replicate 2*			Total parasite count in biological replicate 1*	Total parasite count in biological replicate 2*
DMSO	241	268		DMSO	145	156		DMSO	20	23
ATQ	219	255		ATQ	109	141		ATQ	22	6
KDU691	229	258		KDU691	183	102		KDU691	28	5
TQ	62	33		TQ	18	10		TQ	1	2
	Day 8 (LISP2 positive)			Day 15 (LISP2 positive)					Day 21(LISP2 positive)
	Total parasite count in biological replicate 1*	Total parasite count in biological replicate 2*			Total parasite count in biological replicate 1*	Total parasite count in biological replicate 2*			Total parasite count in biological replicate 1*	Total parasite count in biological replicate 2*
DMSO	151	137		DMSO	97	73		DMSO	22	13
ATQ	77	50		ATQ	91	66		ATQ	18	11
KDU691	34	12		KDU691	82	27		KDU691	8	5
TQ	60	79		TQ	36	40		TQ	3	5
	* sum of parasite counted in 5 wells

## Sheet: Figure 4D
					Data from three biological replicates are pooled together for each drug treatment is shown
					ATQ												ATQ
Concentartion (nM)	LISP2- Hypnozoite											Concentartion (nM)	LISP2 expressing parasites
5000	9	12	16	2	3	5	1	0	0			5000	5	6	7	0	0	0	0	0	0
1666.67	31	27	19	8	14	18	8	11	3			1666.67	4	11	4	0	0	0	1	0	0
555.556	39	42	47	21	26	14	17	0	16			555.556	7	4	7	1	0	1	0	0	0
185.185	44	51	48	22	24	21	21	29	0			185.185	7	8	5	4	3	1	6	4	0
61.7284	54	63	0	18	21	22	32	49	0			61.7284	9	4	0	3	6	2	11	4	0
20.5761	54	70	49	19	24	26	59	61	0			20.5761	17	22	11	5	7	9	24	31	0
6.85871	47	66	0	21	24	19	57	0	0			6.85871	15	21	0	8	7	9	27	0	0
DMSO	47	64	57	24	16	19	49	64	0			DMSO	27	19	19	9	7	8	25	33	0
					KDU691												KDU691
Concentartion (nM)	LISP2- Hypnozoite											Concentartion (nM)	LISP2 expressing parasites
10000	1	7	8	4	1	6	3	0	8			10000	0	0	0	0	1	0	0	0	0
3333.33	23	29	19	9	18	14	11	0	14			3333.33	1	1	3	0	0	0	1	0	0
1111.11	63	46	49	17	19	14	24	0	27			1111.11	1	1	3	0	2	1	3	0	3
370.37	48	64	58	14	23	16	31	0	0			370.37	4	8	10	1	4	3	2	0	0
123.457	64	59	67	17	21	14	56	42	0			123.457	18	19	19	3	5	7	8	11	0
41.1523	58	51	0	22	19	26	49	64	51			41.1523	16	14	0	6	9	8	14	26	11
13.7174	60	53	0	26	21	18	62	44	0			13.7174	17	16	0	11	8	9	29	21	0
DMSO	49	0	61	26	23	22	49	64	0			DMSO	22	0	22	12	9	7	25	33	0
					TQ												TQ
Concentartion (nM)	LISP2- Hypnozoite											Concentartion (nM)	LISP2 expressing parasites
10000	4	0	2	0	0	0	2	1	0			10000	6	2	3	0	0	0	0	0	0
3333.33	7	6	3	0	2	1	1	0	1			3333.33	15	7	9	1	0	1	0	0	1
1111.11	21	31	24	4	6	4	4	0	10			1111.11	9	15	8	1	4	1	2	0	9
370.37	45	41	18	11	13	8	18	0	0			370.37	20	30	21	6	7	8	14	0	0
123.457	42	42	47	15	10	16	43	0	0			123.457	23	23	25	7	5	7	17	0	0
41.1523	0	62	58	14	17	21	29	54	0			41.1523	0	23	25	7	9	6	14	21	0
13.7174	64	55	68	19	18	24	39	62	0			13.7174	19	21	22	8	8	9	22	19	0
DMSO	61	67	59	19	26	24	49	64	0			DMSO	23	22	20	7	8	11	25	33	0
